# Supplementary material
Source: HighWire-hosted journal article supplement (https://bmjopen.bmj.com/content/9/10/e031766)
Supplement: inline-supplementary-material-1 [file inline-supplementary-material-1.pdf]

Supplementary File 1. The questionnaire survey completed by patients.

**Questionnaire**

**1. What reason below best fits with the reason you had the caesarean section? (Please tick beside most appropriate answer)**

1. Fetal Distress i.e. there was concern about the baby in labour
2. Failure to Progress/Failed induction of labour/Very slow or poor progress in labour
3. Maternal medical reason (e.g. diabetes, low lying placenta)
4. Baby in the wrong position (e.g. breech, transverse)
5. No success with delivery of the baby with forceps or vacuum
6. Other
7. Don't know

**2. Was it a planned procedure in advance (called elective) or what was it an emergency? \_\_\_\_\_**

**3. Are you satisfied that the caesarean section was the best option, for you in those circumstances, for the delivery of the baby?**

1. Very satisfied
2. Satisfied
3. Not sure
4. Not satisfied
5. Very unsatisfied

**4. Do you feel the care you received was professional and supportive from the doctors?**

1. Very satisfied
2. Satisfied
3. Not sure
4. Not satisfied
5. Very unsatisfied

PTO

**5. Do you feel the care you received was professional and supportive from the midwifery team?**

1. Very satisfied
2. Satisfied
3. Not sure
4. Not satisfied
5. Very unsatisfied

**6. Are you satisfied that you received adequate information about the reason for caesarean section at the time of your delivery?**

1. Very satisfied
2. Satisfied
3. Not sure
4. Not satisfied
5. Very unsatisfied

**7. Are you satisfied that you received adequate information and counselling in the postnatal period (i.e. after delivery)?**

1. Very satisfied
2. Satisfied
3. Not sure
4. Not satisfied
5. Very unsatisfied

**8. What would be your preferred option for a future delivery?**

1. Normal labour and delivery
2. Repeat planned caesarean section
3. Undecided

**9. If you have a future pregnancy, discussion will take place between you and your doctor about the best method of delivery again, i.e. a normal labour and delivery or a repeat caesarean section. Sometimes the answer is not always clear. If there is a research study on this topic, which assigns you to one or the other option, would you agree to participate?**

1. Yes
2. No

*(If you did opt into a research study you would have the power to opt out at any time if you*

*changed your mind. This question is for research purposes only and will not affect your future care in any way.)*
